# Supplementary material for: Emergence of double-dome superconductivity in ammoniated metal-doped FeSe
Source: PubMed Central journal article supplement (PMC4381328; doi:10.1038/srep09477), 2015-04-01
Supplement: srep09477-s1.pdf [file srep09477-s1.pdf]

# Supplementary Information

## Emergence of double-dome superconductivity in ammoniated metal-doped FeSe

**Masanari Izumi<sup>1</sup>, Lu Zheng<sup>1</sup>, Yusuke Sakai<sup>1</sup>, Hidenori Goto<sup>1</sup>, Masafumi Sakata<sup>1,2,3,4</sup>, Yuki Nakamoto<sup>4</sup>, Huyen L. T. Nguyen<sup>1,2</sup>, Tomoko Kagayama<sup>4</sup>, Katsuya Shimizu<sup>4</sup>, Shingo Araki<sup>5</sup>, Tatsuo C. Kobayashi<sup>5</sup>, Takashi Kambe<sup>5</sup>, Dachun Gu<sup>6</sup>, Jing Guo<sup>6</sup>, Jing Liu<sup>7</sup>, Yanchun Li<sup>7</sup>, Liling Sun<sup>6</sup>, Kosmas Prassides<sup>3,8</sup>, and Yoshihiro Kubozono<sup>1,2\*</sup>**

<sup>1</sup>Research Laboratory for Surface Science, Okayama University, Okayama 700-8530, Japan

<sup>2</sup>Research Centre of New Functional Materials for Energy Production, Storage and Transport, Okayama University, Okayama 700-8530, Japan

<sup>3</sup>Department of Chemistry, University of Durham, Durham DH1 3LE, UK

<sup>4</sup>Centre for Science and Technology under Extreme Conditions, Osaka University, Osaka 560-8531, Japan

<sup>5</sup>Department of Physics, Okayama University, Okayama 700-8530, Japan

<sup>6</sup>Institute of Physics and Beijing National Laboratory for Condensed Matter Physics, Chinese Academy of Science, Beijing 100190, China

<sup>7</sup>Institute of High Energy Physics, Chinese Academy of Science, Beijing 100049, China

<sup>8</sup>WPI Research Centre, Advanced Institute for Materials Research, Tohoku University, Sendai 980-8577, Japan

### Table of Contents

- 1)  $R - T$  plots of the first  $(\text{NH}_3)_y\text{Cs}_{0.4}\text{FeSe}$  sample at 1.9, 5.0, 7.0 and 11 GPa
- 2)  $T_c$  is plotted as a function of  $\alpha$  in the pressure range of 0 - 13 GPa.
- 3)  $T_c$  is plotted as a function of anion height in the pressure range of 0 - 13 GPa.
- 4)  $R - T$  plots of the second  $(\text{NH}_3)_y\text{Cs}_{0.4}\text{FeSe}$  sample at 8.8, 9.5, 11 and 14 GPa
- 5)  $T_c$  is plotted as a function of anion height in the pressure range of 0 - 41 GPa.

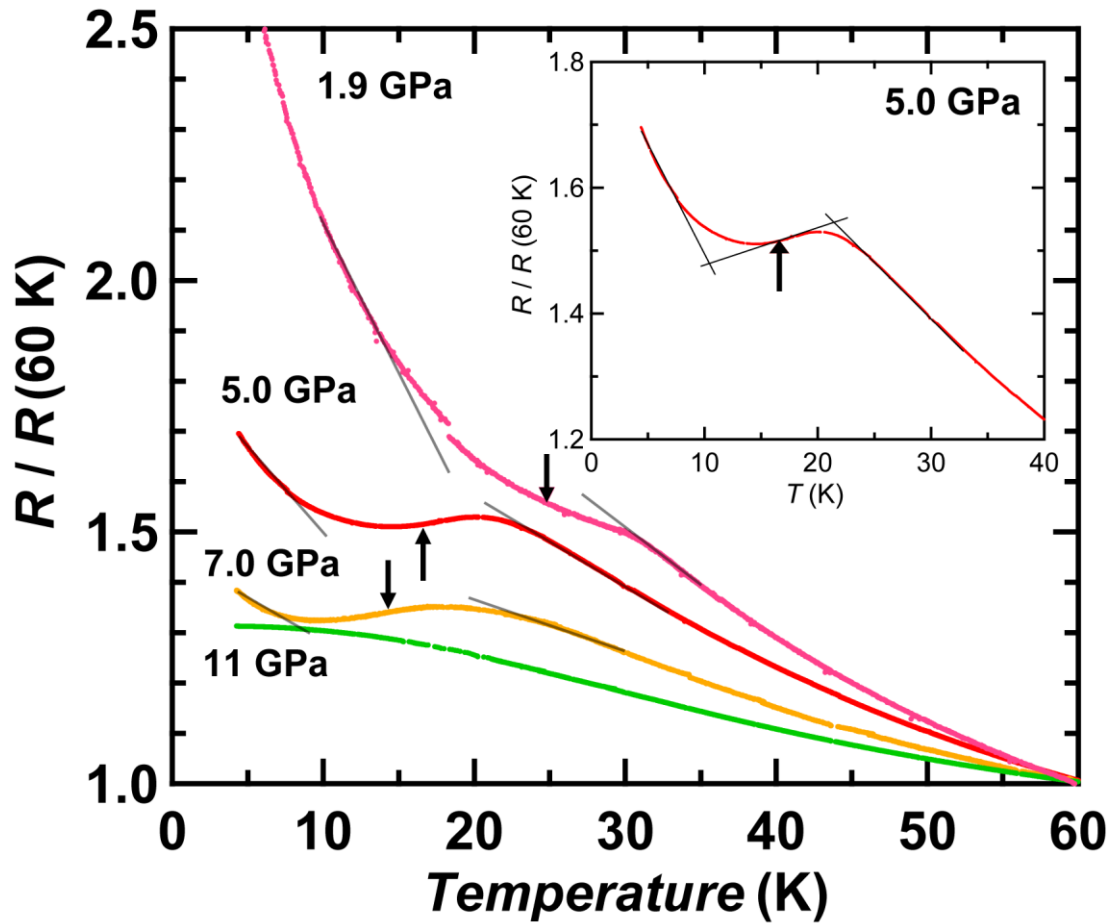

Figure S1. Resistance vs. temperature plots of the first  $(\text{NH}_3)_y\text{Cs}_{0.4}\text{FeSe}$  sample at 1.9, 5.0, 7.0 and 11 GPa. The grey solid lines refer to the fitting ones for the normal and superconducting states. The arrows correspond to the  $T_c$ 's determined from the midpoint. As described in text, the drop is not observed at 11 GPa. Inset: the expanded resistance vs. temperature plot at 5.0 GPa, which is provided to show how to determine the  $T_c$ .

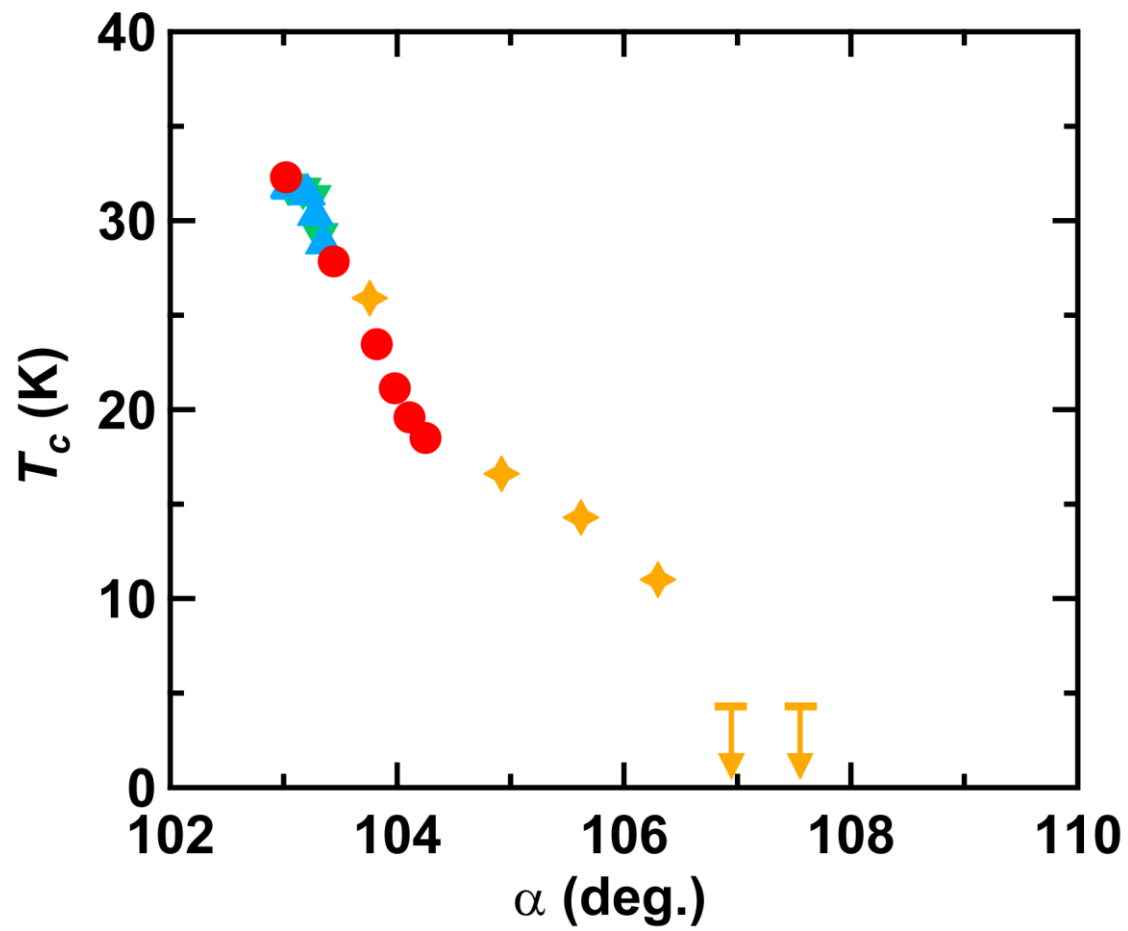

**Figure S2:**  $T_c$  is plotted as a function of  $\alpha$ . The symbols are defined in the caption of Figure 1(c) in text. The arrows indicate  $T_c$ 's lower than the temperatures denoted by bars.

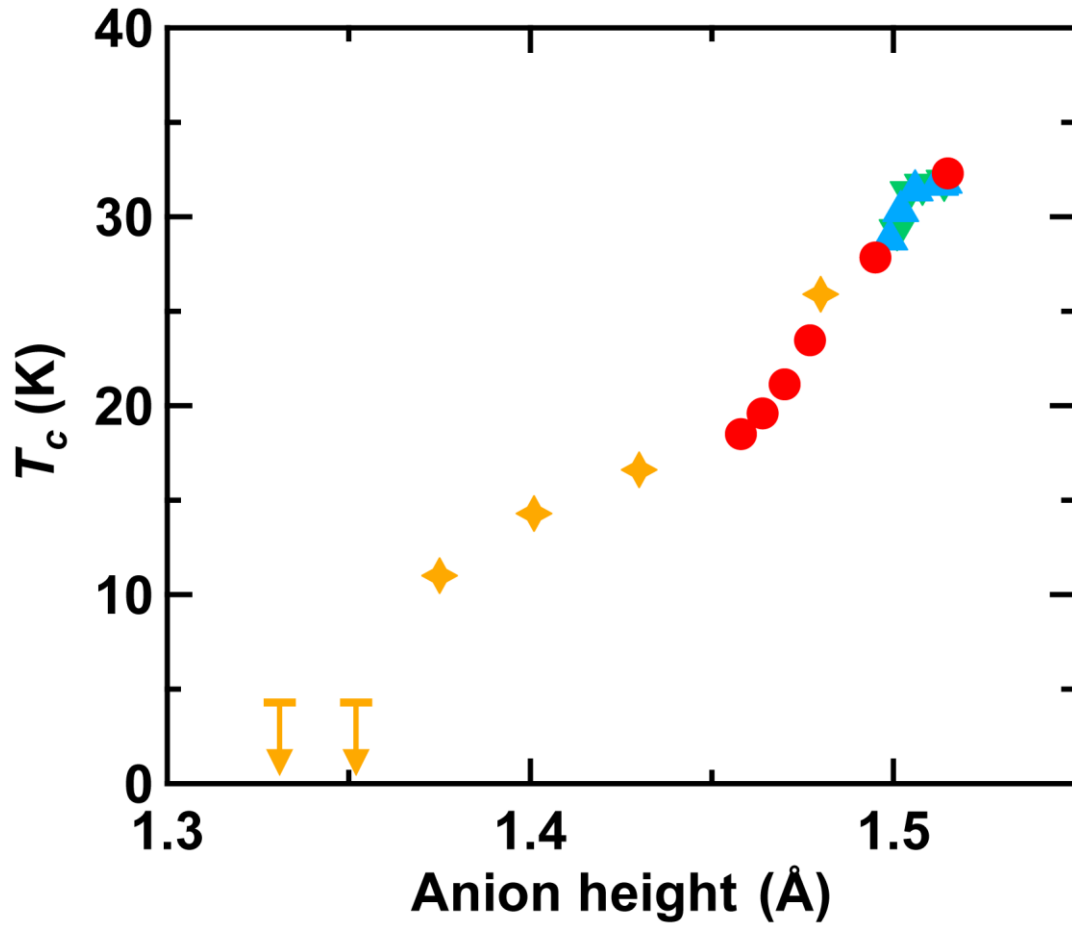

Figure S3:  $T_c$  is plotted as a function of anion height in the pressure range of 0- 13 GPa. The symbols are defined in the caption of Figure 1(c) in text. The arrows indicate  $T_c$ 's lower than the temperatures denoted by bars.

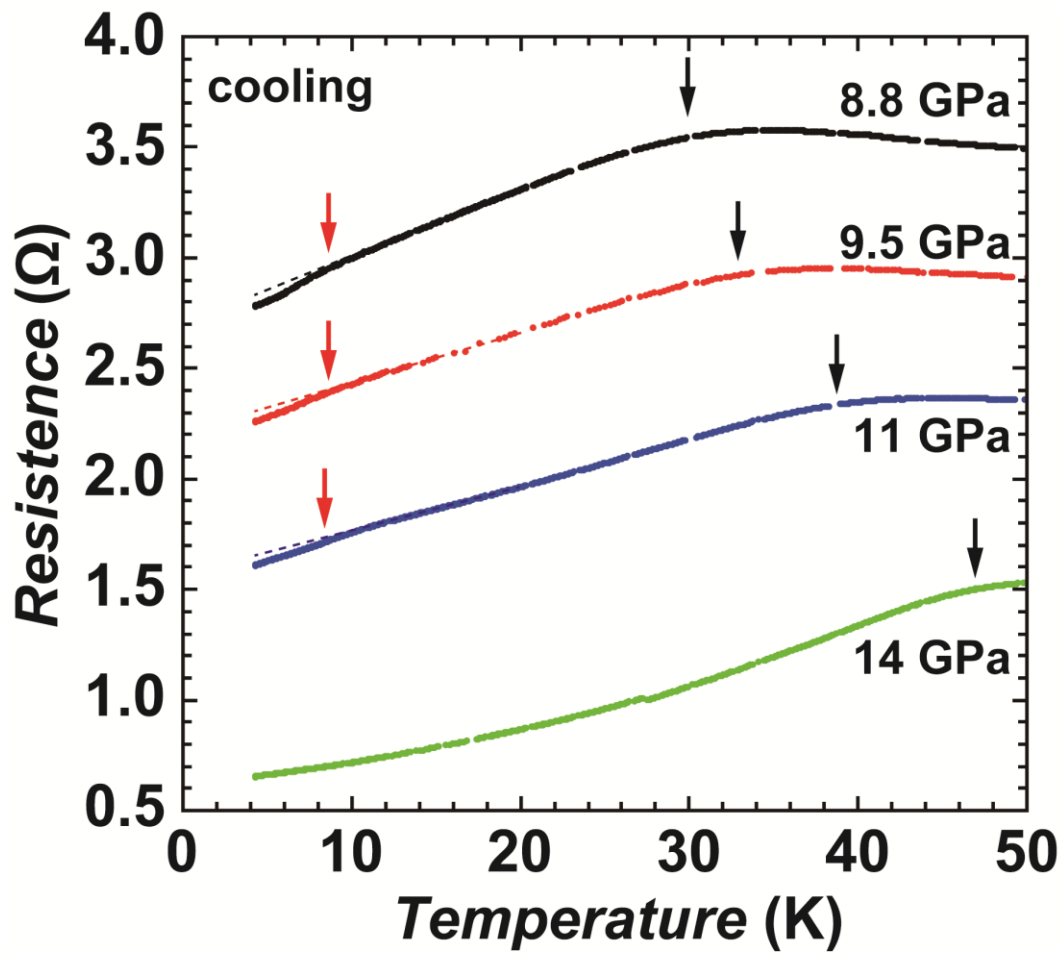

Figure S4: Resistance vs. temperature plots of the second  $(\text{NH}_3)_y\text{Cs}_{0.4}\text{FeSe}$  sample at 8.8, 9.5, 11 and 14 GPa. The arrows correspond to the  $T_c$ 's in two phases. As described in text, small drops are observed in  $R - T$  plots below 10 K at 8.8 and 9.5 GPa. The drop is observed even at 11 GPa, but no drop is observed below 10 K at 14 GPa.

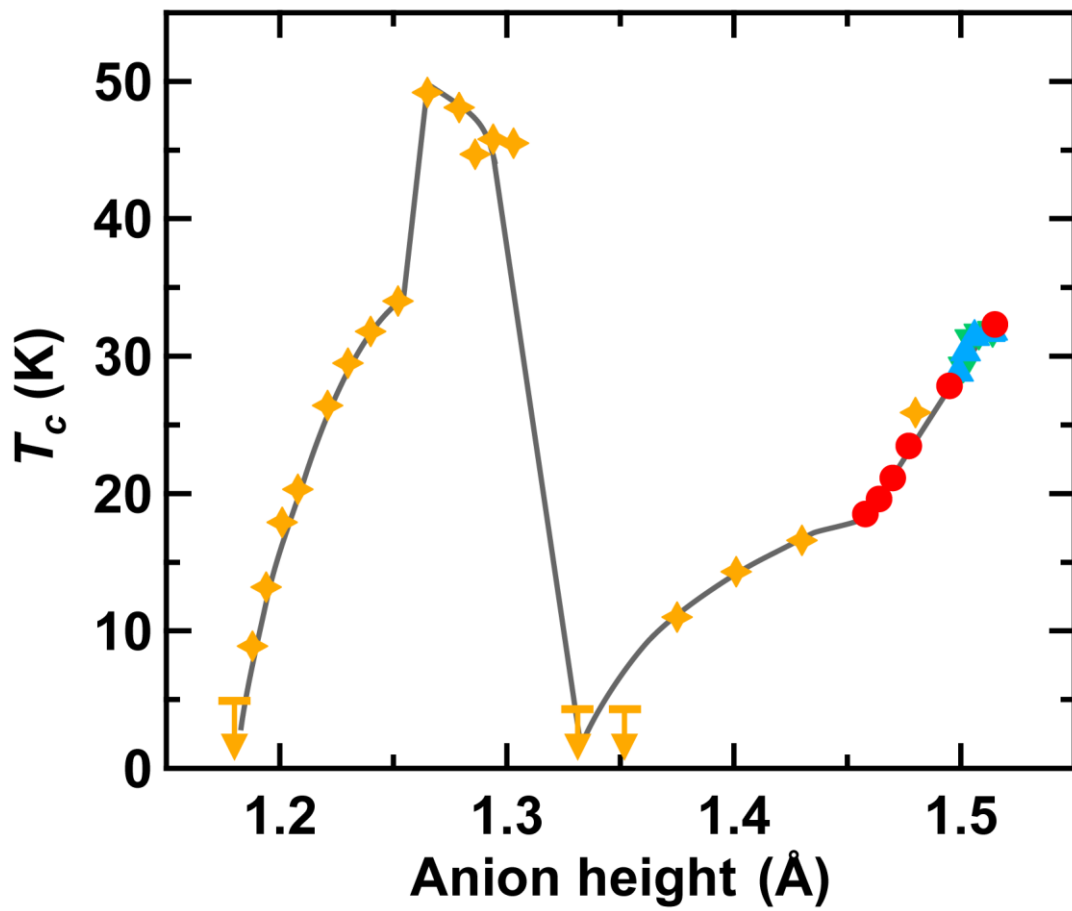

Figure S5:  $T_c$  is plotted as a function of anion height in the pressure range of 0 - 41 GPa. The symbols are defined in the caption of Figure 1(c) in text. The arrows indicate  $T_c$ 's lower than the temperatures denoted by bars. The solid line is a visual aid.
